# Supplementary material for: An integrative approach towards completing genome-scale metabolic networks
Source: Royal Society of Chemistry journal article supplement (doi:10.1039/b915913b), 2009-09-10
Supplement: b915913b3.pdf [file b915913b3.pdf]

### S3 Known pathways in extensions

We determined the number of reactions per extension that are associated with a predefined pathway in Metacyc. Fig. 1 shows a histogram of the relative amount of reactions that are part of a pathway for all the extensions of *Chlamydomonas reinhardtii*. About 75% of all found reactions in an extension are part of a known pathway, the rest of the extension was chosen from a set of reactions that are not yet assembled into well-known pathways. Our algorithm is therefore capable of determining novel routes and interconnecting known pathways.

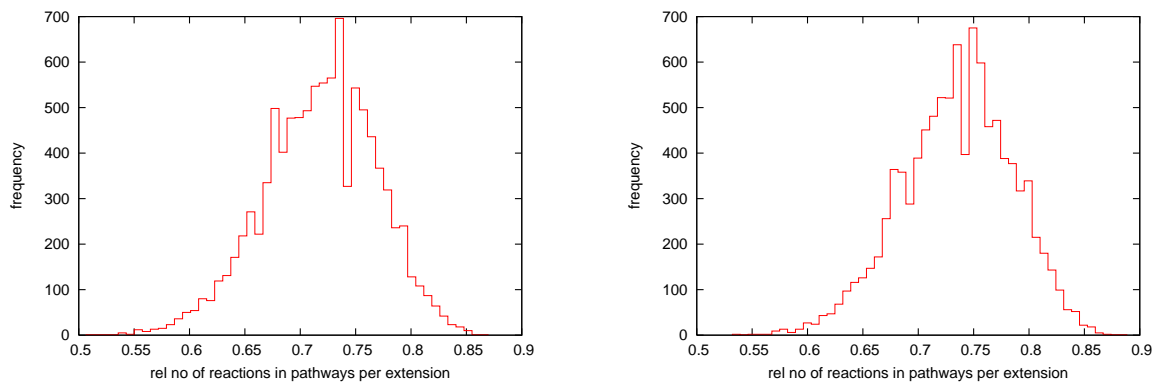

Figure 1: Histogram of the relative number of reactions per extension that are associated with a pathway in MetaCyc. (left) Extensions have been calculated without including sequence information. (right) Extensions were determined including a sequence similarity score.
