# Supplementary material for: An integrative approach towards completing genome-scale metabolic networks
Source: Royal Society of Chemistry journal article supplement (doi:10.1039/b915913b), 2009-09-10
Supplement: b915913b5.pdf [file b915913b5.pdf]

## S5 Cofactor metabolites

The role of cofactors in the network expansion algorithm is described in detail in<sup>1</sup>. We explain the basic idea with the example of the cofactor ATP. The network expansion algorithm determines which metabolites can be produced if initially only substrates from the seed are available. To include reactions requiring for example ATP as a cofactor, ATP has first to be synthesized *de novo* from the seed. However, this is an unrealistic assumption for any living cell, since it can be assumed that there is always enough ATP present to drive cofactor-dependent reactions. To account for this fact, cofactors are treated specially and are formally represented as two compounds, e. g. ATP/ADP and  $\text{ATP}_{\text{cof}}/\text{ADP}_{\text{cof}}$ . Those reactions, in which ATP acts as a cofactor, *i.e.* those in which ATP and ADP appear on opposite sides of the reaction equation, are additionally represented in a form in which the compounds ATP and ADP are replaced by their corresponding cofactor compounds  $\text{ATP}_{\text{cof}}$  and  $\text{ADP}_{\text{cof}}$ . For the calculations, the smaller of the two cofactors,  $\text{ADP}_{\text{cof}}$ , is added to the seed. This procedure ensures that reactions with the cofactor pair ATP/ADP may proceed but the actual compound ATP may not be utilized for example by decomposition into building blocks. Why only the smaller cofactor is added, is explained by the following example. Assume, glucose is in the seed. Additionally we have the cofactor  $\text{ATP}_{\text{cof}}$ . Then, glucose may be phosphorylated to glucose-6-phosphate by a cofactor-driven reaction. In a next step, a phosphorylase may yield glucose and orthophosphate, indicating that phosphate can be produced from glucose, which is clearly absurd. This is avoided by adding only  $\text{ADP}_{\text{cof}}$  to the seed.

| Cofactors                   |                       |         |
|-----------------------------|-----------------------|---------|
| Name                        | MetaCyc-Id            | in Seed |
| N <sup>10</sup> -formyl-THF | 10-FORMYL-THF         |         |
| acetyl-CoA                  | ACETYL-COA            |         |
| ADP                         | ADP                   | ×       |
| AMP                         | AMP                   | ×       |
| ATP                         | ATP                   |         |
| coenzyme A                  | CO-A                  | ×       |
| GDP                         | GDP                   | ×       |
| L-glutamine                 | GLN                   | ×       |
| L-glutamate                 | GLT                   | ×       |
| GTP                         | GTP                   |         |
| NADH                        | NADH                  | ×       |
| NADPH                       | NADPH                 | ×       |
| NADP <sup>+</sup>           | NADP                  | ×       |
| NAD <sup>+</sup>            | NAD                   | ×       |
| phosphoenolpyruvate         | PHOSPHO-ENOL-PYRUVATE | ×       |
| propionyl-CoA               | PROPIONYL-COA         |         |
| pyruvate                    | PYRUVATE              | ×       |
| succinyl-CoA                | SUC-COA               |         |
| tetrahydrofolate            | THF                   | ×       |
| Acceptor                    | Acceptor              | ×       |
| Cytochromes-C-Reduced       | Cytochromes-C-Reduced | ×       |
| Cytochromes-C               | Cytochromes-C         | ×       |
| Donor-H2                    | Donor-H2              | ×       |
| Oxidized-flavodoxins        | Oxidized-flavodoxins  | ×       |
| Reduced-flavodoxins         | Reduced-flavodoxins   | ×       |

## References

- [1] T. Handorf and O. Ebenhöf, *Nucleic Acids Res*, 2007, **35**, W613–W618.
