# Supplementary material for: An integrative approach towards completing genome-scale metabolic networks
Source: Royal Society of Chemistry journal article supplement (doi:10.1039/b915913b), 2009-09-10
Supplement: b915913b7.pdf [file b915913b7.pdf]

## S7 Predicted ergosterol pathway

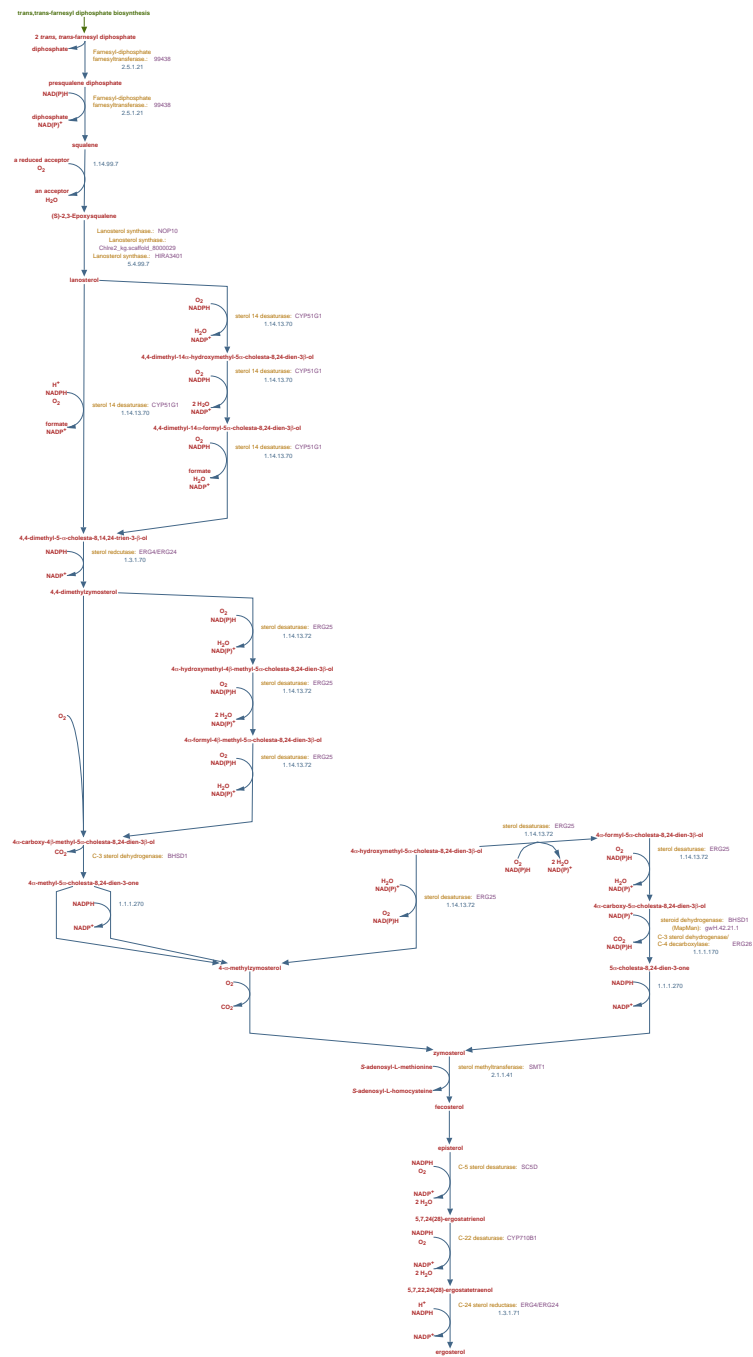

Figure 1: The predicted ergosterol pathway. Shown are reaction together with the annotated enzymes as given by the ChlamyCyc database<sup>1</sup>. The pathway was visualized using the Pathway Tools software<sup>2</sup>

## References

- [1] P. May, J.-O. Christian, S. Kempa and D. Walther, *BMC Genomics*, 2009, **10**, 209.
- [2] P. D. Karp, S. Paley and P. Romero, *Bioinformatics*, 2002, **18 Suppl 1**, S225–S232.
